# Supplementary material for: The Role of Homogeneous Waiting Group Criteria in Patient Referrals: Views of General Practitioners and Specialists in South Tyrol, Italy
Source: MDPI journal article supplement (doi:10.3390/healthcare12100985), 2024-05-10
Supplement: s1 [file s1]

**File S1.** Homogeneous waiting group criteria for first gynecological consultation in Italy.

| Priority Class              | Maximum Waiting Time   | Clinical Indications Recommended by the Working Group                                                                                                                                                                                 |
|-----------------------------|------------------------|---------------------------------------------------------------------------------------------------------------------------------------------------------------------------------------------------------------------------------------|
| Emergency                   | Send to emergency room | Acute pelvic pain<br>Hypertension in pregnancy<br>Severe menometrorrhagia<br>Blood loss in pregnancy                                                                                                                                  |
| Emergency (pediatrics)      | Send to emergency room | Acute pelvic pain<br>Severe menometrorrhagia<br>Suspected sexual abuse                                                                                                                                                                |
| Urgent – U                  | 3 days                 | Ascites from probable gynecological pathology<br>Bartholinitis<br>Persistent vaginitis resistant to therapy<br>Other (10%)**                                                                                                          |
| Urgent – U (pediatrics)     | 3 days                 | Ascites from probable gynecological pathology<br>Bartholinitis<br>Pregnancy in a minor<br>Persistent vaginitis resistant to therapy<br>Other (10%)*                                                                                   |
| Short – B                   | 10 days                | Breast lump<br>"Positive" Pap Test<br>Atypical blood losses (excluding severe menometrorrhagia)<br>Signs/symptoms of probable sexually transmitted disease<br>Suspected gynecological neoplasm<br>Other (10%)*                        |
| Short – B (Pediatrics)      | 10 days                | Atypical blood losses (excluding severe menometrorrhagia)<br>Genital bleeding in pre-pubescence<br>Suspected gynecological neoplasm<br>Other (10%)*                                                                                   |
| Deferrable – D              | 30 days                | Amenorrhea with negative pregnancy test<br>Ovarian cyst<br>Chronic pelvic pain<br>Uterine fibroids<br>Urinary incontinence<br>Utero-vaginal prolapse<br>Suspected genital condylomatosis<br>Assessment for contraception Other (10%)* |
| Deferrable – D (Pediatrics) | 30 days                | Amenorrhea with negative pregnancy test<br>Chronic pelvic pain<br>Other (10%)*                                                                                                                                                        |
| Programmable – P            | 120 days               | Acne/Hirsutism<br>Symptomatic menopause<br>Couple infertility/infertility                                                                                                                                                             |

|                                                                                                                                                                                                                                                                                                                                                                                                                                                                                                                                                                     |          |                                |
|---------------------------------------------------------------------------------------------------------------------------------------------------------------------------------------------------------------------------------------------------------------------------------------------------------------------------------------------------------------------------------------------------------------------------------------------------------------------------------------------------------------------------------------------------------------------|----------|--------------------------------|
| Programmable – P<br>(Pediatrics)                                                                                                                                                                                                                                                                                                                                                                                                                                                                                                                                    | 120 days | Other (10%)*                   |
|                                                                                                                                                                                                                                                                                                                                                                                                                                                                                                                                                                     |          | Acne/Hirsutism<br>Other (10%)* |
| <hr/>                                                                                                                                                                                                                                                                                                                                                                                                                                                                                                                                                               |          |                                |
| First gynecologic visit Class HWG 036 – Code 89.26.1 including any cytologic sampling, any indications in contraceptive or pre-conceptive function. Cannot be associated first obstetrical visit – Code 89.26.3 including eventual cytologic sampling which cannot be associated with first gynecological visit, respectively.<br>*Any clinical condition not included in the recommended clinical indications that is considered to warrant assignment to that specific grouping; it presupposes in each case the detailed description of the clinical conditions. |          |                                |

**Table S1.** Summary of questionnaire items for general practitioners on collaboration, communication, and referral practices.

| Item No. | Category                         | Description                                                                                 | Response Option                                                                                                                                        |
|----------|----------------------------------|---------------------------------------------------------------------------------------------|--------------------------------------------------------------------------------------------------------------------------------------------------------|
| 1        | Collaboration and Communication  | General satisfaction with collaboration and communication with hospital physicians.         | a) Very satisfied<br>b) Satisfied<br>c) Dissatisfied<br>d) Very dissatisfied                                                                           |
| 2        | Collaboration and Communication  | Frequency of phone contact with hospital colleagues for clarifications.                     | a) Often<br>b) Occasionally<br>c) Rarely<br>d) Never                                                                                                   |
| 3        | Collaboration and Communication  | Frequency of contacting hospital colleagues via email about patients.                       | a) Often<br>b) Occasionally<br>c) Rarely<br>d) Never                                                                                                   |
| 4        | Referral Practices               | Frequency of avoiding or expediting specialist referrals through phone contact.             | a) Often<br>b) Occasionally<br>c) Rarely<br>d) Never                                                                                                   |
| 5        | Referral Practices               | Estimated percentage of acute consultation reasons requiring specialist referral.           | a) 80%<br>b) 50%<br>c) 30%<br>d) 10%                                                                                                                   |
| 6        | Influencing Factors for Referral | Factors influencing decision to refer patients to specialists. (Multiple responses allowed) | a) Severity of symptoms<br>b) Urgency of treatment<br>c) Unclear diagnosis<br>d) Patient request<br>e) Limited consultation time<br>f) Other (specify) |
| 7        | Impact of HWG Criteria           | Impact of HWG <sup>1</sup> criteria on waiting times.                                       | a) Facilitated<br>b) Made more difficult<br>c) Reduced waiting times<br>d) Extended waiting times<br>e) Unchanged waiting times                        |
| 8        | Impact of HWG Criteria           | Frequency of prescribing priority visits/exams.                                             | a) Less than 5%<br>b) 10%                                                                                                                              |

|                  |                                                                                                |                                                                            |                                                                                                                                                                               |
|------------------|------------------------------------------------------------------------------------------------|----------------------------------------------------------------------------|-------------------------------------------------------------------------------------------------------------------------------------------------------------------------------|
|                  |                                                                                                |                                                                            | c) 20%                                                                                                                                                                        |
|                  |                                                                                                |                                                                            | d) 30%                                                                                                                                                                        |
|                  |                                                                                                |                                                                            | e) Other (specify)                                                                                                                                                            |
| 9                | Impact of HWG Criteria                                                                         | Agreement with RAO criteria and accessibility.                             | a) Completely agree<br>b) Mostly agree<br>c) Partly agree<br>d) Do not agree at all                                                                                           |
| 10               | Impact of HWG Criteria                                                                         | Adherence to RAO criteria in prescriptions.                                | a) 90%<br>b) 70%<br>c) 50%<br>d) Less than 30%                                                                                                                                |
|                  |                                                                                                |                                                                            | a) Long waits for normal appointments                                                                                                                                         |
|                  |                                                                                                |                                                                            | b) Clinical urgency not matching RAO                                                                                                                                          |
| 11               | Non-compliance with HWG Criteria                                                               | Common reasons for non-compliance with RAO criteria.                       | c) Conditions unresponsive to conventional therapy<br>d) Unclear clinical picture not fitting RAO<br>e) Patient or family pressure<br>f) Other (specify)                      |
| 12               | Non-compliance with HWG Criteria                                                               | Disciplines/areas needing changes in priority criteria.                    | Open-ended response                                                                                                                                                           |
| 13               | Adherence to Expected Waiting Times and Specialties with Adherence Issues                      | Adherence to expected waiting times based on priority criteria.            | a) Absolutely<br>b) Mostly<br>c) No, not really<br>d) Not at all                                                                                                              |
| 14               | Adherence to Expected Waiting Times and Specialties with Adherence Issues                      | Specialties with particular adherence issues to waiting times.             | Open-ended response                                                                                                                                                           |
| 15               | Opinions and Actions Related to Non-Urgent Appointments and Delayed Priority Specialist Visits | Opinion on waiting times for non-urgent appointments.                      | a) Completely long<br>b) Mostly long<br>c) Not really long<br>d) Not long at all                                                                                              |
| 16               | Opinions and Actions Related to Non-Urgent Appointments and Delayed Priority Specialist Visits | Actions taken when a patient requires a delayed priority specialist visit. | a) Suggest private specialist/facility<br>b) Arrange earlier hospital appointment<br>c) Prescribe urgent visit and direct to ER<br>d) Advise direct ER visit without referral |
| ... <sup>2</sup> | Other                                                                                          | Various questions/topic                                                    | Various response options                                                                                                                                                      |

<sup>1</sup>HWG, Homogeneous Waiting Grouping that allows for different timings for access to outpatient specialist services based on explicit clinical indications.

<sup>2</sup>Detailed descriptions and response options for additional questions classified under "Other" are available upon request.

**Table S2.** Summary of questionnaire items for hospital physicians on collaboration, communication, and referral practices.

| Item No. <sup>1</sup> | Category                        | Description                                                                                                                                   | Response Options                                                                               |
|-----------------------|---------------------------------|-----------------------------------------------------------------------------------------------------------------------------------------------|------------------------------------------------------------------------------------------------|
| 1                     | Collaboration and Communication | General satisfaction with collaboration and communication with GPs.                                                                           | a) Very satisfied<br>b) Satisfied<br>c) Dissatisfied<br>d) Very dissatisfied                   |
| 2                     | Collaboration and Communication | Ability to contact GPs by phone for any questions.                                                                                            | a) Often<br>b) Occasionally<br>c) Rarely<br>d) Never                                           |
| 3                     | Collaboration and Communication | Suggestions for reducing waiting times.                                                                                                       | Open-ended response                                                                            |
| 4                     | Collaboration and Communication | Extent of connectivity between your hospital department and general medicine.                                                                 | a) Very well connected<br>b) Well connected<br>c) Poorly connected<br>d) Very poorly connected |
| 5                     | Collaboration and Communication | Importance of establishing a fixed phone number and/or email for each department, accessible to GPs.                                          | a) Very important<br>b) Important<br>c) Not very important<br>d) Not important at all          |
| 6                     | Collaboration and Communication | Additional comments or suggestions for improving collaboration and communication with GPs and the specialist referral system.                 | Open-ended response                                                                            |
| 7                     | Collaboration and Communication | Evaluation of the current work climate and collaboration with colleagues from other disciplines in the hospital.                              | a) Very good<br>b) Good<br>c) Fair<br>d) Poor<br>e) Very poor                                  |
| 8                     | Collaboration and Communication | Additional comments or suggestions for improving collaboration with colleagues from other hospital disciplines.                               | Open-ended response                                                                            |
| 9                     | Referral Practices              | Frequency of seeing patients in priority or urgent visits sent by a GP, which, in your opinion, could have been normal, non-urgent visits.    | a) Less than 10%<br>b) 10-30%<br>c) 30-60%<br>d) More than 60%                                 |
| 10                    | Referral Practices              | Frequency of providing feedback to GPs regarding inappropriate referrals.                                                                     | a) Very often<br>b) Often<br>c) Occasionally<br>d) Rarely<br>e) Never                          |
| 11                    | Referral Practices              | Necessity of creating open slots in specialist clinics for patients with particular problems, accessible through direct phone contact by GPs. | a) Very necessary<br>b) Necessary<br>c) Unnecessary<br>d) Very unnecessary                     |
| 12                    | Referral Practices              | Evaluation of the indication of clinical questions on the referrals                                                                           | a) Very good<br>b) Good                                                                        |

|    |                                                                                                |                                                                                                                                    |                                                                                                                                                               |
|----|------------------------------------------------------------------------------------------------|------------------------------------------------------------------------------------------------------------------------------------|---------------------------------------------------------------------------------------------------------------------------------------------------------------|
|    |                                                                                                | from General Practitioners for specialist visits.                                                                                  | c) Fair<br>d) Poor<br>e) Very poor                                                                                                                            |
| 13 | Referral Practices                                                                             | Frequency of patients receiving an inappropriate referral for a specialist visit due to patient requests.                          | a) Very often<br>b) Often<br>c) Occasionally<br>e) Never                                                                                                      |
| 14 | Referral Practices                                                                             | Common reasons for inappropriate referrals to hospital specialists.                                                                | Open-ended response                                                                                                                                           |
| 15 | Referral Practices                                                                             | Factors frequently influencing GPs' decisions to refer patients to specialists and the urgency level. (Multiple responses allowed) | a) Severity of symptoms<br>b) Urgency of treatment<br>c) Unclear diagnosis<br>d) Patient request<br>e) Limited consultation time<br>f) Other (please explain) |
| 16 | Impact of HWG <sup>1</sup> Criteria                                                            | Level of awareness about current guidelines and HWG criteria for priority patient referrals by GPs.                                | a) Very well informed<br>b) Well informed<br>c) Fairly informed<br>d) Poorly informed                                                                         |
| 17 | Adherence to Expected Waiting Times and Specialties with Adherence Issues                      | Opinion on whether waiting times for normal, deferrable visits are generally too long.                                             | a) Yes, absolutely<br>b) Yes, mostly<br>c) No, not really<br>d) No, not at all                                                                                |
| 18 | Opinions and Actions Related to Non-Urgent Appointments and Delayed Priority Specialist Visits | Belief that improving HWG priority criteria by GPs could reduce the number of inappropriate referrals.                             | a) Yes, certainly<br>b) Yes, probably<br>c) No, probably not<br>d) No, not at all                                                                             |
| 19 | Opinions and Actions Related to Non-Urgent Appointments and Delayed Priority Specialist Visits | Overall satisfaction with the current patient referral system to specialists.                                                      | a) Very satisfied<br>b) Satisfied<br>c) Dissatisfied<br>d) Very dissatisfied                                                                                  |
| 20 | Opinions and Actions Related to Non-Urgent Appointments and Delayed Priority Specialist Visits | Favorability towards the development of alternative care methods, such as telemedicine.                                            | a) Yes, definitely<br>b) Yes, probably<br>c) No, probably not<br>d) No, not at all                                                                            |

<sup>1</sup>HWG, Homogeneous Waiting Groupings that allows for different timings for access to outpatient specialist services based on explicit clinical indications.

**Table S3.** General practitioner perspectives on proposals for improvement of communication and collaboration.

| Item                                                                                                                                                                                                   | Response                               | Rate (%) <sup>1</sup> |
|--------------------------------------------------------------------------------------------------------------------------------------------------------------------------------------------------------|----------------------------------------|-----------------------|
| How important is it to you that health agency communications include a brief summary of the organizational changes?                                                                                    | Very important or important            | 80.5                  |
|                                                                                                                                                                                                        | Less important or not important        | 12.2                  |
| How important would it be to you for the health agency to create a link where you can find all the forms, circulars and regulations that affect you as a GP?                                           | Very important or important            | 89.1                  |
|                                                                                                                                                                                                        | Less important or not important        | 3.6                   |
| How important would it be for you to have a telephone number for initial consultations and examinations and a number for follow-up visits for GPs only?                                                | Very important or important            | 70.8                  |
|                                                                                                                                                                                                        | Less important or not important        | 22.0                  |
| How important would it be to you that the Health Agency's primary care services are led by experienced general practitioners rather than specialists in hygiene?                                       | Very important Important               | 86.6                  |
|                                                                                                                                                                                                        | Less important Not important           | 5.1                   |
| Should 3 to 4 annual meetings be organized with the medical management of the primary care services at district level in order to address problems in good time and discuss possible solutions?        | Yes, definitely or yes, but less often | 83.0                  |
|                                                                                                                                                                                                        | No, rather not or no, not at all       | 7.3                   |
| How important is it to you that every specialist in the hospital has a fixed telephone number where they can be reached daily and where they can guarantee to call you back if they cannot be reached? | Very important or important            | 72.0                  |
|                                                                                                                                                                                                        | Less important or not important        | 19.5                  |

<sup>1</sup> No indication of missing answers.
